# Supplementary material for: Specialized shuttle proteins recognize and address type IX secretion effectors
Source: Research Square preprint supplement (doi:10.21203/rs.3.rs-5685358/v1), 2025-03-20
Supplement: Supplementary file 1 [file 394b817a217031afbf135275.docx]

**STRAINS**

| Strains | Description | Source or Reference |
| --- | --- | --- |
| *Escherichia coli* strains | | |
| DH5α | Strain used for general cloning | Laboratory collection |
| HB101 | Strain containing the pRK2013 plasmid for triparental conjugation | Laboratory collection |
| S17-1 λ pir | Strain used for conjugation | Laboratory collection |
| *Flavobacterium johnsoniae* strains with chromosomal fusions (all derived from the Sm Resistant strain CJ1827) | | |
| CJ1827 | *rpsL*2 SmR “wild-type” *F. johnsoniae* strain | Rhodes *et al*., 2011 |
| *sprB-halotag-CTD* | HaloTag insertion upstream SprB CTD | This study |
| *sprB-halotag-CTDAmyB* | CTD of AmyB fused to the SprB-HaloTag fusion | This study |
| *sprB-halotag-CTDRemA* | CTD of RemA fused to the SprB-HaloTag fusion | This study |
| *amyB-halotag-CTD* | HaloTag insertion upstream AmyB CTD | This study |
| *amyB-halotag-CTDSprB* | CTD of SprB fused to the AmyB-HaloTag fusion | This study |
| *remA-halotag-CTD* | HaloTag insertion upstream RemA CTD | This study |
| *remA-halotag-CTDSprB* | CTD of SprB fused to the RemA-HaloTag fusion | This study |
| *sprB-halotag-CTDFjoh_1123* | CTD of Fjoh_1123 fused to the SprB-HaloTag fusion | This study |
| *sprB-halotag-CTDFjoh_3952* | CTD of Fjoh_3952 fused to the SprB-HaloTag fusion | This study |
| *Fjoh_1123-halotag-CTD* | HaloTag insertion upstream Fjoh_1123 CTD | This study |
| *Fjoh_3952-halotag-CTD* | HaloTag insertion upstream Fjoh_3952 CTD | This study |

**PLASMIDS**

| Plasmid | Description and main characteristics | Source or Reference |
| --- | --- | --- |
| pRR51 | Suicide vector containing a wild-type *rpsL* allele, AmpR-EmR | Rhodes *et al*. 2011 |
| pSK30 | Encodes SPRemA-sfGFP-CTDRemA; AmpR-TcR | Kulkarni *et al.* 2017 |
| pSK37 | Encodes SPRemA-sfGFP; AmpR-TcR | Kulkarni *et al.* 2017 |
| pSK55 | Encodes SPRemA-sfGFP-CTDSprB and SprF; AmpR-TcR | Kulkarni *et al.* 2019 |
| pSK56 | Encodes SPRemA-sfGFP-CTDSprB; AmpR-TcR | Kulkarni *et al.* 2017 |
| pSK57 | Encodes SPRemA-sfGFP-CTDFjoh_3952 and Fjoh_3951; AmpR-TcR | Kulkarni *et al.* 2019 |
| pSK82 | Encodes SPRemA-sfGFP-CTDAmyB; AmpR-TcR | Kulkarni *et al.* 2017 |
| pMP12 | Encodes SPRemA-sfGFP-CTDFjoh_1123; AmpR-TcR | This study |
| pMP53 | Encodes SPRemA-sfGFP-CTDFjoh_1720; AmpR-TcR | This study |
| pMP54 | Encodes SPRemA-sfGFP-CTDFjoh_4934; AmpR-TcR | This study |
| pMP73 | Encodes SPRemA-sfGFP-CTDSprB-motEFjoh_3952 and SprF; AmpR-TcR | This study |
| pMP74 | Encodes SPRemA-sfGFP-CTDSprB-motEFjoh_3952 and Fjoh_3951; AmpR-TcR | This study |
| pMP75 | Encodes SPRemA-sfGFP-CTDFjoh_4934 and Fjoh_1677; AmpR-TcR | This study |
| pMP76 | Encodes SPRemA-sfGFP-CTDFjoh_1123 and Fjoh_1677; AmpR-TcR | This study |
| pMP77 | Encodes SPRemA-sfGFP-CTDFjoh_1720 and Fjoh_1677; AmpR-TcR | This study |
| pMP78 | Encodes SPRemA-sfGFP-CTDSprB-motBFjoh_3952 and Fjoh_3951; AmpR-TcR | This study |
| pMP79 | Encodes SPRemA-sfGFP-CTDSprB-motBEFjoh_3952 and Fjoh_3951; AmpR-TcR | This study |
| pMP80 | Encodes SPRemA-sfGFP-CTDSprB-motBFjoh_3952 and SprF; AmpR-TcR | This study |
| pMP81 | Encodes SPRemA-sfGFP-CTDSprB-motBEFjoh_3952 and SprF; AmpR-TcR | This study |
| pMP82 | Encodes SPRemA-sfGFP-CTDFjoh_3952 and Fjoh_1646; AmpR-TcR | This study |
| pMP83 | Encodes SPRemA-sfGFP-CTDFjoh_3952 and Fjoh_3972; AmpR-TcR | This study |
| pMP84 | Encodes SPRemA-sfGFP-CTDFjoh_3952 and SprF; AmpR-TcR | This study |
| pMP88 | Encodes SPRemA-sfGFP-CTDFjoh_3971 and Fjoh_3951; AmpR-TcR | This study |
| pMP89 | Encodes SPRemA-sfGFP-CTDSprB and Fjoh_3951; AmpR-TcR | This study |
| pRR51-SprB-HaloTag-CTD | Construct used to generate SprB-HaloTag-CTD fusion; AmpR-EmR | This study |
| pRR51-SprB-HaloTag-CTDAmyB | Construct used to generate SprB-HaloTag-CTDAmyB fusion; AmpR-EmR | This study |
| pRR51-SprB-HaloTag-CTDRemA | Construct used to generate SprB-HaloTag-CTDRemA fusion; AmpR-EmR | This study |
| pRR51-AmyB-HaloTag-CTD | Construct used to generate AmyB-HaloTag-CTD fusion; AmpR-EmR | This study |
| pRR51-AmyB-HaloTag-CTDSprB | Construct used to generate AmyB-HaloTag-CTDSprB fusion; AmpR-EmR | This study |
| pRR51-RemA-HaloTag-CTD | Construct used to generate RemA-HaloTag-CTD fusion; AmpR-EmR | This study |
| pRR51-RemA-HaloTag-CTDSprB | Construct used to generate RemA-HaloTag-CTDSprB fusion; AmpR-EmR | This study |
| pRR51-SprB-HaloTag-CTDFjoh_1123 | Construct used to generate SprB-HaloTag-CTDFjoh_1123 fusion; AmpR-EmR | This study |
| pRR51-SprB-HaloTag-CTDFjoh_3952 | Construct used to generate SprB-HaloTag-CTDFjoh_3952 fusion; AmpR-EmR | This study |
| pRR51-Fjoh_1123-HaloTag-CTD | Construct used to generate Fjoh_1123-HaloTag-CTD fusion; AmpR-EmR | This study |
| pRR51-Fjoh_3952-HaloTag-CTD | Construct used to generate Fjoh_3952-HaloTag-CTD fusion; AmpR-EmR | This study |
