# Supplementary material for: Specialized shuttle proteins recognize and address type IX secretion effectors
Source: Research Square preprint supplement (doi:10.21203/rs.3.rs-5685358/v1), 2025-03-20
Supplement: Supplementary file 1 [file 01237d9d24684a8fdf200d82.pdf]

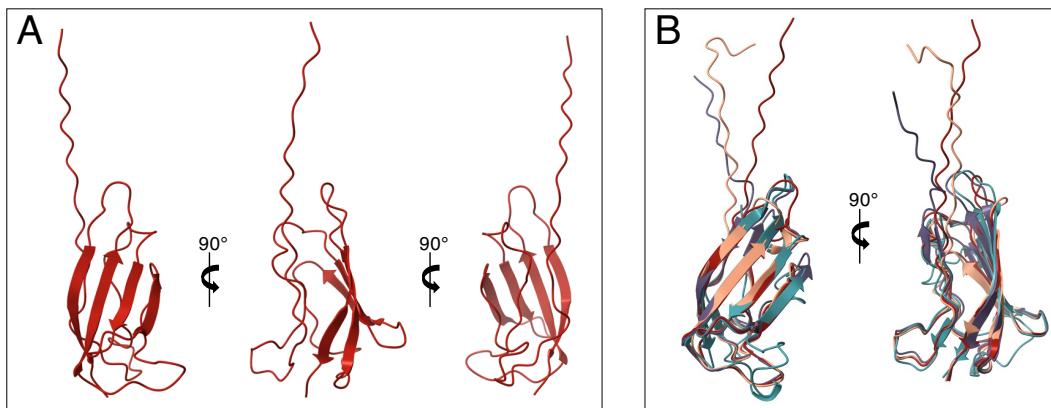

**Figure S1. Predicted structure of the CTD of SprB, and its alignment to CTDs of Fjoh\_1123 (orange), Fjoh\_3952 (blue) and Fjoh\_4750 (violet). (A)** The structure of the last 100 amino acids of SprB (A), Fjoh\_1123, Fjoh\_3952 and Fjoh\_4750 have been predicted using Alphafold3 (Abramson et al., 2024), with respective pTM scores of 0.82, 0.83, 0.85 and 0.86. Predicted structures of Fjoh\_1123, Fjoh\_3952 and Fjoh\_4750 were aligned to the predicted structure of the CTD of SprB using ChimeraX-1.9 **(B)** For each pair of structures, sequence alignment scores, number of aligned residues and rmsd of these aligned residues are listed in **Table S3**.
