# Supplementary material for: Specialized shuttle proteins recognize and address type IX secretion effectors
Source: Research Square preprint supplement (doi:10.21203/rs.3.rs-5685358/v1), 2025-03-20
Supplement: Supplementary file 2 [file 5fa7f96522f5fa685eba3c27.docx]

**S1 Text**

The suicide plasmid designed to generate the SprB-HaloTag-CTD fusion was made as follows. A 1.5-kb fragment containing *sprB*, directly upstream of the CTD encoding sequence, was PCR amplified using oligonucleotide primers oTM964 and oTM743 on *F. johnsoniae* genomic DNA matrix. For clarity, this will not be repeated in subsequent sections of the text, but unless otherwise specified, the matrix used for PCR amplifications is the genomic DNA of *Flavobacterium*. A 885-bp fragment encoding HaloTag was PCR amplified using oligonucleotides primers oTM744 and oTM745 on plasmid matrix pSU005 (Banaz et al., 2019). For the next sections, unless otherwise specified, the matrix used for PCR amplification of HaloTag is pSU005. A 1.5-kb fragment containing the CTD and the region directly downstream *sprB* was PCR amplified using oligonucleotide primers oTM746 and oTM965. These fragments were assembled using Gibson isothermal reaction and reamplified using oligonucleotides oTM964 and oTM965. This fragment was inserted into pRR51 digested with *Xba*I using Gibson isothermal reaction.

The suicide plasmid designed to generate the SprB-HaloTag-CTDAmyB fusion was made as follows. A 1.7-kb fragment containing *sprB* was PCR amplified using oligonucleotide primers oTM1469 and oTM1470. A 885-bp fragment encoding HaloTag was PCR amplified using oligonucleotides primers oTM744 and oTM745. A 390-bp fragment containing the CTD of AmyB was PCR amplified using oligonucleotide primers oTM1576 and oTM1579. A 1.7-kb fragment containing the region directly downstream *sprB* was PCR amplified using oligonucleotide primers oTM1580 and oTM1472. These fragments were assembled using Gibson isothermal reaction and reamplified using oligonucleotides oTM1469 and oTM1472. This fragment was inserted into pRR51 digested with *Xba*I using Gibson isothermal reaction.

The suicide plasmid designed to generate the SprB-HaloTag-CTDRemA fusion was made as follows. A 1.7-kb fragment containing *sprB* was PCR amplified using oligonucleotide primers oTM1469 and oTM1470. A 885-bp fragment encoding HaloTag was PCR amplified using oligonucleotides primers oTM744 and oTM745. A 339-bp fragment containing the CTD of RemA was PCR amplified using oligonucleotide primers oTM1471 and oTM1475. A 1.7-kb fragment containing the region directly downstream *sprB* was PCR amplified using oligonucleotide primers oTM1478 and oTM1472. These fragments were assembled using Gibson isothermal reaction and reamplified using oligonucleotides oTM1469 and oTM1472. This fragment was inserted into pRR51 digested with *Xba*I using Gibson isothermal reaction.

The suicide plasmid designed to generate the AmyB-HaloTag-CTD fusion was made as follows. A 1.7-kb fragment containing *amyB* was PCR amplified using oligonucleotide primers oTM1677 and oTM1678. A 885-bp fragment encoding HaloTag was PCR amplified using oligonucleotides primers oTM744 and oTM745. A 1.7-kb fragment containing the CTD and region directly downstream *amyB* was PCR amplified using oligonucleotide primers oTM1576 and oTM1679. These fragments were assembled using Gibson isothermal reaction and reamplified using oligonucleotides oTM1677 and oTM1679. This fragment was inserted into pRR51 digested with *Xba*I using Gibson isothermal reaction.

The suicide plasmid designed to generate the AmyB-HaloTag-CTDSprB fusion was made as follows. A 1.7-kb fragment containing *amyB* was PCR amplified using oligonucleotide primers oTM1677 and oTM1678. A 885-bp fragment encoding HaloTag was PCR amplified using oligonucleotides primers oTM744 and oTM745. A 657-bp fragment containing the CTD of SprB was PCR amplified using oligonucleotide primers oTM1475 and oTM1680. A 1.4-kb fragment containing the region directly downstream *amyB* was PCR amplified using oligonucleotide primers oTM1681 and oTM1679. These fragments were assembled using Gibson isothermal reaction and reamplified using oligonucleotides oTM1677 and oTM1679. This fragment was inserted into pRR51 digested with *Xba*I using Gibson isothermal reaction.

The suicide plasmid designed to generate the RemA-HaloTag-CTD fusion was made as follows. A 1.7-kb fragment containing *remA* was PCR amplified using oligonucleotide primers oTM1473 and oTM1474. A 885-bp fragment encoding HaloTag was PCR amplified using oligonucleotides primers oTM744 and oTM745. A 2.1-kb fragment containing the CTD and region directly downstream *remA* was PCR amplified using oligonucleotide primers oTM1471 and oTM1477. These fragments were assembled using Gibson isothermal reaction and reamplified using oligonucleotides oTM1473 and oTM1477. This fragment was inserted into pRR51 digested with *Xba*I using Gibson isothermal reaction.

The suicide plasmid designed to generate the RemA-HaloTag-CTDSprB fusion was made as follows. A 1.7-kb fragment containing *remA* was PCR amplified using oligonucleotide primers oTM1473 and oTM1474. A 885-bp fragment encoding HaloTag was PCR amplified using oligonucleotides primers oTM744 and oTM745. A 657-bp fragment containing the CTD of SprB was PCR amplified using oligonucleotide primers oTM1475 and oTM1680. A 2.1-kb fragment containing the region directly downstream *remA* was PCR amplified using oligonucleotide primers oTM1822 and oTM1477. These fragments were assembled using Gibson isothermal reaction and reamplified using oligonucleotides oTM1473 and oTM1477. This fragment was inserted into pRR51 digested with *Xba*I using Gibson isothermal reaction.

The suicide plasmid designed to generate the Fjoh_4750-HaloTag-CTD fusion was made as follows. A 1.7-kb fragment containing Fjoh_4750 was PCR amplified using oligonucleotide primers oTM1219 and oTM1220. A 885-bp fragment encoding HaloTag was PCR amplified using oligonucleotides primers oTM744 and oTM745. A 1.5-kb fragment containing the region directly downstream Fjoh_4750 was PCR amplified using oligonucleotide primers oTM1221 and oTM1222. These fragments were assembled using Gibson isothermal reaction and reamplified using oligonucleotides oTM1219 and oTM1222. This fragment was inserted into pRR51 digested with *Xba*I using Gibson isothermal reaction.

The suicide plasmid designed to generate the Fjoh_1123-HaloTag-CTD fusion was made as follows. A 1.7-kb fragment containing Fjoh_1123 was PCR amplified using oligonucleotide primers oTM1585 and oTM1586. A 885-bp fragment encoding HaloTag was PCR amplified using oligonucleotides primers oTM744 and oTM745. A 1.6-kb fragment containing the region directly downstream Fjoh_1123 was PCR amplified using oligonucleotide primers oTM1587 and oTM1588. These fragments were assembled using Gibson isothermal reaction and reamplified using oligonucleotides oTM1585 and oTM1588. This fragment was inserted into pRR51 digested with *Xba*I using Gibson isothermal reaction.

The suicide plasmid designed to generate the Fjoh_3952-HaloTag-CTD fusion was made as follows. A 1.6-kb fragment containing Fjoh_3952 was PCR amplified using oligonucleotide primers oTM1721 and oTM1722. A 885-bp fragment encoding HaloTag was PCR amplified using oligonucleotides primers oTM744 and oTM745. A 1.6-kb fragment containing the region directly downstream Fjoh_3952 was PCR amplified using oligonucleotide primers oTM1723 and oTM1724. These fragments were assembled using Gibson isothermal reaction and reamplified using oligonucleotides oTM1721 and oTM1724. This fragment was inserted into pRR51 digested with *Xba*I using Gibson isothermal reaction.

The suicide plasmid designed to generate the SprB-HaloTag-CTDFjoh_1123 fusion was made as follows. pRR51-SprB-HaloTag-CTD was amplified using oligonucleotide primers oTM745 and oTM2027. CTDFjoh_1123 sequence was amplified using oligonucleotide primers oTM1587 and oTM2026. These fragments were assembled using Gibson isothermal reaction.

The suicide plasmid designed to generate the SprB-HaloTag-CTDFjoh_3952 fusion was made as follows. pRR51-SprB-HaloTag-CTD was amplified using oligonucleotide primers oTM745 and oTM2027. CTDFjoh_3952 sequence was amplified using oligonucleotide primers oTM1723 and oTM2028. These fragments were assembled using Gibson isothermal reaction.

Plasmids expressing SPRemA-sfGFP fused to CTD-containing regions of *F. johnsoniae* Fjoh_1123, Fjoh_1720 and Fjoh_4934 were generated as follows. A 762-bp fragment encoding the CTD of Fjoh_1123 was PCR amplified using oligonucleotide primers oTM1008 and oTM1009. This fragment was digested with *Xba*Iand *Sph*I and inserted into plasmid pSK30 (Kulkarni et al., 2017) cut with the same restriction enzymes, generating plasmid pMP12. A 821-bp fragment encoding the CTD of Fjoh_1720 was PCR amplified using oligonucleotide primers oTM1634 and oTM1635. This fragment was digested with *Xba*Iand *Sph*I and inserted into plasmid pSK30 cut with the same restriction enzymes, generating plasmid pMP53. A 736-bp fragment encoding the CTD of Fjoh_4934 was PCR amplified using oligonucleotide primers oTM1636 and oTM1637. This fragment was digested with *Xba*Iand *Sph*I and inserted into plasmid pSK30 cut with the same restriction enzymes, generating plasmid pMP54.

Plasmid pMP75, which encodes both SPRemA-sfGFP-CTDFjoh_4934 and Fjoh_1677 was constructed. *fjoh_1677* and pMP54 were amplified using oligonucleotide primers oTM1991 and oTM1909, and oTM1989 and oTM1990, respectively. PCR fragments were assembled using Gibson isothermal reaction.

Plasmid pMP76, which encodes both SPRemA-sfGFP-CTDFjoh_1123 and Fjoh_1677 was constructed. *fjoh_1677* and pMP12 were amplified using oligonucleotide primers oTM1908 and oTM1909, and oTM1989 and oTM1988, respectively. PCR fragments were assembled using Gibson isothermal reaction.

Plasmid pMP77, which encodes both SPRemA-sfGFP-CTDFjoh_1720 and Fjoh_1677 was constructed. *fjoh_1677* and pMP53 were amplified using oligonucleotide primers oTM2018 and oTM1909, and oTM1989 and oTM2019, respectively. PCR fragments were assembled using Gibson isothermal reaction.

Plasmids pMP73 and pMP74, which encodes both SPRemA-sfGFP-CTDSprB-MotEFjoh_3952 and SprF, and SPRemA-sfGFP-CTDSprB-MotEFjoh_3952 and Fjoh_3951 were synthetized by Twist Bioscience.

Plasmid pMP78, which encodes both SPRemA-sfGFP-CTDSprB-MotBFjoh_3952 and Fjoh_3951 was constructed. CTDSprB-MotBFjoh_3952 synthetized gene and pSK57 were amplified using oligonucleotide primers oTM1786 and oTM2042, and oTM1705 and oTM1791, respectively. PCR fragments were assembled using Gibson isothermal reaction.

Plasmid pMP79, which encodes both SPRemA-sfGFP-CTDSprB-MotBEFjoh_3952 and Fjoh_3951 was constructed. CTDSprB-MotBEFjoh_3952 synthetized gene and pSK57 were amplified using oligonucleotide primers oTM1786 and oTM2046, and oTM1705 and oTM1791, respectively. PCR fragments were assembled using Gibson isothermal reaction.

Plasmid pMP80, which encodes both SPRemA-sfGFP-CTDSprB-MotBFjoh_3952 and SprF was constructed. CTDSprB-MotBFjoh_3952 synthetized gene and pSK57 were amplified using oligonucleotide primers oTM1786 and oTM2041, and oTM1705 and oTM2060, respectively. PCR fragments were assembled using Gibson isothermal reaction.

Plasmid pMP81, which encodes both SPRemA-sfGFP-CTDSprB-MotBEFjoh_3952 and SprF was constructed. CTDSprB-MotBEFjoh_3952 synthetized gene and pSK55 were amplified using oligonucleotide primers oTM1786 and oTM2045, and oTM1705 and oTM2060, respectively. PCR fragments were assembled using Gibson isothermal reaction.

Plasmid pMP82, which encodes both SPRemA-sfGFP-CTDFjoh_3952 and Fjoh_1646 was constructed. *fjoh_1646* and pSK57 were amplified using oligonucleotide primers oTM2021 and oTM2022, and oTM2020 and oTM1989, respectively. PCR fragments were assembled using Gibson isothermal reaction.

Plasmid pMP83, which encodes both SPRemA-sfGFP-CTDFjoh_3952 and Fjoh_3972 was constructed. *fjoh_3972* and pSK57 were amplified using oligonucleotide primers oTM2038 and oTM2036, and oTM2029 and oTM1989, respectively. PCR fragments were assembled using Gibson isothermal reaction.

Plasmid pMP84, which encodes both SPRemA-sfGFP-CTDFjoh_3952 and SprF was constructed. *sprF* and pSK57 were amplified using oligonucleotide primers oTM1788 and oTM2032, and oTM2031 and oTM1989, respectively. PCR fragments were assembled using Gibson isothermal reaction.

Plasmid pMP84, which encodes both SPRemA-sfGFP-CTDFjoh_3952 and SprF was constructed. *sprF* and pSK57 were amplified using oligonucleotide primers oTM1788 and oTM2032, and oTM2031 and oTM1989, respectively. PCR fragments were assembled using Gibson isothermal reaction.

Plasmid pMP89, which encodes both SPRemA-sfGFP-CTDSprB and Fjoh_3951 was constructed. *fjoh_3951*and pSK55 were amplified using oligonucleotide primers oTM2009 and oTM2007, and oTM2008 and oTM2005, respectively. PCR fragments were assembled using Gibson isothermal reaction.

Banaz, N., Mäkelä, J., Uphoff, S., 2019. Choosing the right label for single-molecule tracking in live bacteria: side-by-side comparison of photoactivatable fluorescent protein and Halo tag dyes. J Phys D Appl Phys 52, 064002. https://doi.org/10.1088/1361-6463/aaf255

Kulkarni, S.S., Zhu, Y., Brendel, C.J., McBride, M.J., 2017. Diverse C-Terminal Sequences Involved in Flavobacterium johnsoniae Protein Secretion. J Bacteriol 199. https://doi.org/10.1128/JB.00884-16
