# Supplementary material for: Specialized shuttle proteins recognize and address type IX secretion effectors
Source: Research Square preprint supplement (doi:10.21203/rs.3.rs-5685358/v1), 2025-03-20
Supplement: Supplementary file 2 [file 522ee577d26c98f1f900c952.pdf]

| Structure pair | Sequence alignment score | Number of aligned residues | rmsd of pruned atom pairs (Å) |
|----------------|--------------------------|----------------------------|-------------------------------|
| SprB/Fjoh_1123 | 238.8                    | 77                         | 0.624                         |
| SprB/Fjoh_3952 | 131.4                    | 67                         | 0.976                         |
| SprB/Fjoh_4750 | 161.7                    | 72                         | 0.665                         |

**Table S3. Sequence alignment scores, number of aligned residues and rmsd of predicted structure of SprB CTD aligned to predicted structures of the CTDs of Fjoh\_1123, Fjoh\_3952 and Fjoh\_4750.**
