# Supplementary material for: Specialized shuttle proteins recognize and address type IX secretion effectors
Source: Research Square preprint supplement (doi:10.21203/rs.3.rs-5685358/v1), 2025-03-20
Supplement: Supplementary file 3 [file aaa26ebdcd036c4cbed4731a.pdf]

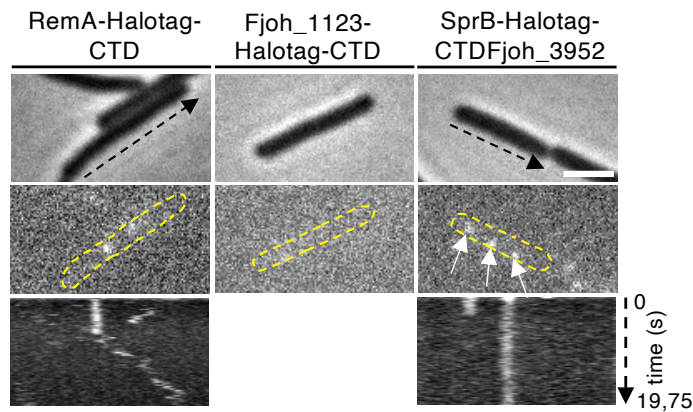

**Figure S3. Localization and dynamics of Fjoh\_1123-HaloTag-CTD, RemA-HaloTag-CTD and SprB-HaloTag-CTD<sub>Fjoh\_3952</sub> fusions.** For all strains, cells were sandwiched between an agarose pad (2%) and a glass coverslip to significantly limit cell movement to facilitate fluorescence signal acquisition and analysis. Fluorescence was recorded at 250 ms intervals for several seconds. A representative cell is shown. The phase contrast image (top panel), the first frame (middle panel), and the kymograph of the fluorescence signal (bottom panel, the x axis corresponds to the black arrow in the top panel) are shown. Scale bar, 2  $\mu$ m.
