# Supplementary material for: Specialized shuttle proteins recognize and address type IX secretion effectors
Source: Research Square preprint supplement (doi:10.21203/rs.3.rs-5685358/v1), 2025-03-20
Supplement: Supplementary file 3 [file c61892661c14694acd3646ec.docx]

**OLIGONUCLEOTIDES**

| Oligonucleotides | Sequence 5' to 3' |
| --- | --- |
| oTM743 | CAGTACCGATTTCGGAACCTGCAGCCATATTAGACTGTGCATTGTT |
| oTM744 | GGTTCCGAAATCGGTACTG |
| oTM745 | ACCGGAAATCTCCAGAGTAG |
| oTM746 | CTACTCTGGAGATTTCCGGTCCTGTGGTGATTACAATTGATCC |
| oTM964 | CGGAAAAATTCGGGGGATCCTCTAGAGATGGTACTATCACAGCGAC |
| oTM965 | TTGCATGCCTGCAGGTCGACTCTAGACCATGAAACCAGCCATTGGC |
| oTM1008 | GACG*TCTAGA*TTCGTAAATGATCTGCCAACAG |
| oTM1009 | GACG*GCATGC*ATAAATGTTTGAATGCCATCTCCT |
| oTM1219 | CGGAAAAATTCGGGGGATCCTCTAGAGTCTGCTCCTGTAGTTTCTC |
| oTM1220 | CAGTACCGATTTCGGAACCTGCAGCATCAAATCTCATAATTGTCCA |
| oTM1221 | CTACTCTGGAGATTTCCGGTGCTGCACAGCTTACACCTTCAATCGA |
| oTM1222 | TTGCATGCCTGCAGGTCGACTCTAGAGTTTCATACGGAAGCAGCAA |
| oTM1469 | CGGAAAAATTCGGGGGATCCTCTAGAACAATTTCTGGACCAATGCCAGA |
| oTM1470 | CGAATGGAAAGCCAGTACCGATTTCCATATTAGACTGTGCATTGTTAACAC |
| oTM1471 | GGCTGTCTACTCTGGAGATTTCCGGTGATCGTTTTGCACTTCGTTACAC |
| oTM1472 | TTGCATGCCTGCAGGTCGACTCTAGATGTGCTCTGTGTGCTGTTCCAA |
| oTM1473 | CGGAAAAATTCGGGGGATCCTCTAGACTGCCACGCGGCAACTAGTC |
| oTM1474 | CGAATGGAAAGCCAGTACCGATTTCTGTAAAAGTTCCCGCTTCTGTT |
| oTM1475 | GGCTGTCTACTCTGGAGATTTCCGGTGTGGTGATTACAATTGATCCAAGC |
| oTM1477 | TTGCATGCCTGCAGGTCGACTCTAGAGGCGATTACAACATTTACCCAGGAT |
| oTM1478 | TAAAAAATCCATTTGCCAAGTAAGCAAAATAATAGCCCCTATGATGTTATCT |
| oTM1576 | GGCTGTCTACTCTGGAGATTTCCGGTGAACCAACAACTGTTGGAACAGGA |
| oTM1579 | AGATAACATCATAGGGGCTATTATTTTGCGAATCGAACAATAGCGAACAAGC |
| oTM1580 | CAAAATAATAGCCCCTATGATGTTATCT |
| oTM1585 | CGGAAAAATTCGGGGGATCCTCTAGATATAGATGTTCCTCCAGCTATAGGTT |
| oTM1586 | CGAATGGAAAGCCAGTACCGATTTCATCATTTACGAATAAGTCTAAACTTGTTTCAG |
| oTM1587 | GGCTGTCTACTCTGGAGATTTCCGGTCTGCCAACAGTAATGATTGAAAAAAC |
| oTM1588 | TTGCATGCCTGCAGGTCGACTCTAG*A*AAGCTTTAGCTTTTGACCTTGGAG |
| oTM1634 | TGGT*TCTAGA*CCGGTTGTCACCAACGAAAA |
| oTM1635 | CTAG*GCATGC*GACGTTTCTGATCGCGATTTTG |
| oTM1636 | TGGT*TCTAGA*GATCCGCCAAATTTTGAAAATGAATC |
| oTM1637 | CTAG*GCATGC*GGTATAGTTCGGATTCGGACT |
| oTM1638 | CGGAAAAATTCGGGGGATCCTCTAGAGAGAAGGTGTATTGATTGCTGC |
| oTM1639 | CCGTTTACAGATTTTATAACCATAATATTTTTAATGGTTAGCTAGTTTATATAATTTTTGCTCT |
| oTM1640 | AAAAATATTATGGTTATAAAATCTGTAAACGG |
| oTM1641 | TTGCATGCCTGCAGGTCGACTCTAGACAGCAGACTGATTATACTTCGG |
| oTM1677 | CGGAAAAATTCGGGGGATCCTCTAGAGACGAGGCGATTTAACGACG |
| oTM1678 | CGAATGGAAAGCCAGTACCGATTTCTAATTGCCATTGCGCGCTGT |
| oTM1679 | TTGCATGCCTGCAGGTCGACTCTAGATGATAATGCTCAATTACATCTTCGC |
| oTM1680 | TTATCTGTATAAAGTGAAATGTCCAACAAAC |
| oTM1681 | GTTTGTTGGACATTTCACTTTATACAGATAAGCTTGTTCGCTATTGTTCGATTCG |
| oTM1705 | TCTAGAACCAGAACCACCACC |
| oTM1721 | CGGAAAAATTCGGGGGATCCTCTAGAGGTTAATCCGGTTAACGATGC |
| oTM1722 | CGAATGGAAAGCCAGTACCGATTTCGGCGGCTTCGACAAAAATCTTAACTATTGCATCT |
| oTM1723 | GGCTGTCTACTCTGGAGATTTCCGGTGTGCCATCGATTACAGTAGTTATGA |
| oTM1724 | TTGCATGCCTGCAGGTCGACTCTAGACGCAGGAAGATTTCATGCGAG |
| oTM1786 | GTGGTGGTTCTGGTTCTAGAGTGGTGATTACAATTGATCCAAGCA |
| oTM1788 | CAAAATAATAGCCCCTATGA |
| oTM1791 | TAGTCCAAATCAATAAAATGGCTTAGC |
| oTM1822 | GTTGGACATTTCACTTTATACAGATAAAATTACACTTCTAAACCCAAATAAAAAATCCAT |
| oTM1908 | GGAGATGGCATTCAAACATTTATCGTACGAAATTAATAAGAGAGCAAAA |
| oTM1909 | CGCCAAGCTTGCTAGGCATGCTTAATTAACTGCAGGGCAATTAC |
| oTM1988 | ATAAATGTTTGAATGCCATCTCCT |
| oTM1989 | GCATGCCTAGCAAGCTTGGCG |
| oTM2005 | GCATGCCTAGCAAGCTTGGC |
| oTM2007 | GCCAAGCTTGCTAGGCATGCTTCATTTTCATAATTAGAAAAATCTTGGT |
| oTM2008 | TTATCTGTATAAAGTGAAATGTCCAACAA |
| oTM2009 | ATTTCACTTTATACAGATAATAGTCCAAATCAATAAAATGGCTTA |
| oTM2018 | CAAAATCGCGATCAGAAACGTCCGTACGAAATTAATAAGAGAGCAA |
| oTM2019 | GACGTTTCTGATCGCGATTTTG |
| oTM2020 | GCTCAGCTTATCGTAAGCCGGCTAAGCCATTTTATTGATTTGGA |
| oTM2021 | CGGCTTACGATAAGCTGAGC |
| oTM2022 | CGCCAAGCTTGCTAGGCATGCTTAAAAGAATCTTGGTGAGGTAAGTTTG |
| oTM2026 | AGATAACATCATAGGGGCTATTATTTTGATAAATGTTTGAATGCCATCTCCTTAAT |
| oTM2027 | CAAAATAATAGCCCCTATGATGTTATCT |
| oTM2028 | AGATAACATCATAGGGGCTATTATTTTGGGCTTAACCTAATGGCTAAGCC |
| oTM2029 | AGATAACATCATAGGGGCTATTATTTTGGGTATAGTTCGGATTCGGACTTTAG |
| oTM2031 | TCATAGGGGCTATTATTTTGGCTAAGCCATTTTATTGATTTGGA |
| oTM2032 | CGCCAAGCTTGCTAGGCATGCGTGCATCATTACAACGAAAACG |
| oTM2036 | CGCCAAGCTTGCTAGGCATGCGCCAGAAGTAGGAGTATAGTAATTCTT |
| oTM2038 | AATAGGATAACCAAAATAAGAATTGGCTATG |
| oTM2041 | TCATAGGGGCTATTATTTTGTTATCTGTATAAAGTGAAATGTCCAACAAAC |
| oTM2042 | TAAGCCATTTTATTGATTTGGACTATTATCTGTATAAAGTGAAATGTCCAACAAAC |
| oTM2045 | TCATAGGGGCTATTATTTTGTTATTTAATTAG |
| oTM2046 | GCTAAGCCATTTTATTGATTTGGACTATTATTT |
| oTM2060 | CAAAATAATAGCCCCTATGATGTTATCT |
|  |  |

a restriction site in italic.

b sequence annealing on the target vector underlined
