# Supplementary material for: Specialized shuttle proteins recognize and address type IX secretion effectors
Source: Research Square preprint supplement (doi:10.21203/rs.3.rs-5685358/v1), 2025-03-20
Supplement: Supplementary file 4 [file afabe2105160d6e770b36cb2.pdf]

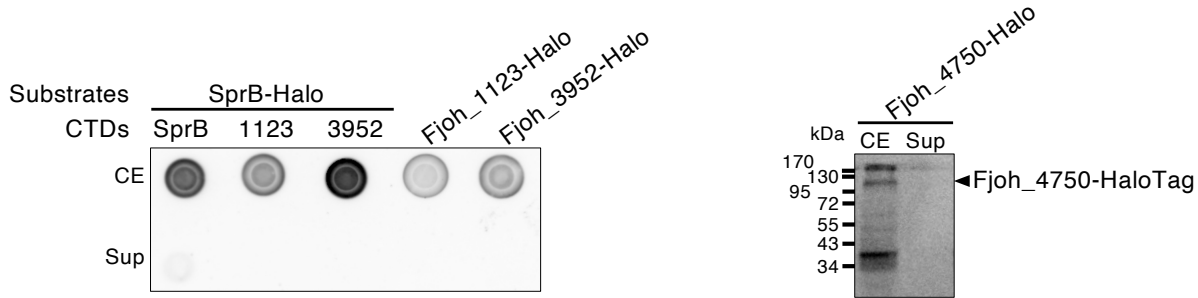

**Figure S4. Secretion profile of the HaloTag fusions.** The secretion of the different HaloTag fusions used in the study was monitored. Total cell extract (CE) and supernatant (Sup) were separated and analyzed by anti-HaloTag immunoblotting.
